# Supplementary material for: The Chemistry of Atmosphere-Forest Exchange (CAFE) Model – Part 2: Application to BEARPEX-2007 observations
Source: Copernicus journal article supplement (doi:10.5194/acp-11-1269-2011), 2011-02-15
Supplement: Supplementary file 1 [file acp-11-1269-2011-supplement.pdf]

## **The Chemistry of Atmosphere-Forest Exchange (CAFE) Model,**

### **Part II: Application to BEARPEX-2007 Observations**

#### *Supplementary Online Material*

G. M. Wolfe, J. A. Thornton, N. C. Bouvier-Brown, A. H. Goldstein, J.-H. Park, M. McKay, D. M. Matross, J. Mao, W. H. Brune, B. W. LaFranchi, E. C. Browne, K.-E. Min, P. J. Wooldridge, R. C. Cohen, J. D. Crouse, I. C. Faloona, J. B. Gilman, W. C. Kuster, J. A. de Gouw, A. Huisman, and F. N. Keutsch

#### *Contents*

Table S1: BEARPEX-2007 chemical observations

Table S2: Model-measurement inter-comparison for selected observations

**Table S1.** BEARPEX-2007 chemical observations. Statistics are calculated from a merged, 30-minute averaged dataset for noontime (11:30 – 12:30 PST) data collected during the hot (28 August – 3 September) and cool (Averages from 13 – 18 September) periods as defined in the main paper. Comma-separated heights denote different measuring heights for hot and cold periods. Mean concentrations ( $\bar{C}$ ) and standard deviations ( $\sigma_C$ ) are in ppbv unless otherwise specified.  $N$  represents the number of points included in the average.

| Species                                  | Height<br>m | Hot Period |            |    | Cool Period |            |    | Ref. <sup>a</sup> |
|------------------------------------------|-------------|------------|------------|----|-------------|------------|----|-------------------|
|                                          |             | $\bar{C}$  | $\sigma_C$ | N  | $\bar{C}$   | $\sigma_C$ | N  |                   |
| OH<br>( $10^6$ molec cm <sup>-3</sup> )  | 9.4         | 6.8        | 0.5        | 4  | 4.0         | 1.2        | 7  | i                 |
|                                          | 15          | 8.0        | 2.7        | 8  | -           | -          | -  |                   |
| HO <sub>2</sub>                          | 9.4         | 0.029      | 0.003      | 4  | 0.021       | 0.004      | 7  | i                 |
|                                          | 15          | 0.033      | 0.005      | 8  | -           | -          | -  |                   |
| CO                                       | 12.5        | 97         | 14         | 21 | 116         | 10         | 18 | ii                |
| O <sub>3</sub>                           | 1.2         | 49.6       | 11.0       | 7  | 44.0        | 6.6        | 6  | iii               |
|                                          | 4.9         | 51.3       | 11.4       | 7  | 45.5        | 6.6        | 6  |                   |
|                                          | 8.75        | 51.6       | 11.3       | 7  | 45.3        | 6.0        | 6  |                   |
|                                          | 12.5        | 50.8       | 11.6       | 7  | 45.5        | 5.5        | 6  |                   |
| $\tau_{OH}^{-1}$ (s <sup>-1</sup> )      | 9.9         | 12.4       | 2.0        | 17 | 6.8         | 1.2        | 12 | iv                |
| <u>NO<sub>y</sub></u><br>NO <sub>2</sub> | 4.9         | 0.273      | 0.135      | 3  | 0.314       | 0.074      | 11 | v                 |
|                                          | 9           | 0.139      | 0.065      | 4  | 0.368       | 0.115      | 12 |                   |
|                                          | 12.7        | 0.050      | 0.022      | 3  | 0.346       | 0.091      | 13 |                   |
| $\Sigma$ PN <sup>b</sup>                 | 4.9         | -          | -          | -  | 0.458       | 0.101      | 9  | v                 |
|                                          | 9           | 0.185      | 0.104      | 3  | 0.430       | 0.099      | 11 |                   |
|                                          | 12.7        | 0.295      | 0.177      | 3  | 0.413       | 0.097      | 12 |                   |
| $\Sigma$ AN <sup>c</sup>                 | 4.9         | 0.142      | 0.035      | 2  | 0.130       | 0.072      | 11 | v                 |
|                                          | 9           | 0.147      | 0.146      | 2  | 0.119       | 0.066      | 11 |                   |
|                                          | 12.7        | -          | -          | -  | 0.096       | 0.074      | 10 |                   |
| PAN                                      | 1.5         | 0.130      | 0.078      | 14 | 0.458       | 0.171      | 12 | vi                |
|                                          | 5           | 0.152      | 0.070      | 14 | 0.471       | 0.154      | 12 |                   |
|                                          | 17.8        | 0.159      | 0.079      | 7  | 0.449       | 0.129      | 6  |                   |

**Table S1.** Continued.

|                                   |          |       |       |    |       |       |    |      |
|-----------------------------------|----------|-------|-------|----|-------|-------|----|------|
| PPN                               | 1.5      | 0.006 | 0.004 | 14 | 0.039 | 0.014 | 12 | vi   |
|                                   | 5        | 0.009 | 0.005 | 14 | 0.041 | 0.014 | 12 |      |
|                                   | 17.8     | 0.009 | 0.005 | 7  | 0.039 | 0.011 | 6  |      |
| MPAN                              | 1.5      | 0.031 | 0.012 | 14 | 0.029 | 0.009 | 12 | vi   |
|                                   | 5        | 0.031 | 0.013 | 14 | 0.034 | 0.014 | 12 |      |
|                                   | 17.8     | 0.020 | 0.011 | 7  | 0.030 | 0.011 | 6  |      |
| HNO <sub>3</sub>                  | 16.8     | 0.555 | 0.190 | 16 | 0.273 | 0.004 | 3  | vii  |
| HONO                              | 16.8     | 0.022 | 0.014 | 9  | 0.046 | 0.007 | 2  | vii  |
| <b><u>Alkenes</u></b>             |          |       |       |    |       |       |    |      |
| isoprene                          | 6.4      | 1.645 | 0.676 | 20 | 0.211 | 0.071 | 15 | viii |
| <b><u>Organic Acids</u></b>       |          |       |       |    |       |       |    |      |
| CH <sub>3</sub> CO <sub>2</sub> H | 16.8     | 4.494 | 2.398 | 16 | 2.078 | 0.149 | 3  | vii  |
| HCOOH                             | 16.8     | 4.099 | 2.530 | 13 | 2.396 | 0.028 | 3  | vii  |
| CH <sub>3</sub> CO <sub>3</sub> H | 16.8     | 0.289 | 0.087 | 12 | 0.138 | 0.012 | 3  | vii  |
| <b><u>Alcohols</u></b>            |          |       |       |    |       |       |    |      |
| MBO                               | 6.4      | 3.182 | 1.092 | 20 | 0.623 | 0.261 | 15 | viii |
| CH <sub>3</sub> OH                | 6.4      | 5.637 | 1.683 | 20 | 4.644 | 1.083 | 15 | viii |
| C <sub>2</sub> H <sub>5</sub> OH  | 6.4      | 1.560 | 0.519 | 20 | 1.400 | 0.389 | 15 | viii |
| IPOPOL                            | 6.4      | 0.080 | 0.035 | 20 | 0.074 | 0.016 | 15 | viii |
| <b><u>Aldehydes</u></b>           |          |       |       |    |       |       |    |      |
| MACR                              | 6.4      | 0.404 | 0.189 | 20 | 0.120 | 0.036 | 15 | viii |
| CH <sub>3</sub> CHO               | 6.4      | 0.549 | 0.185 | 20 | 0.426 | 0.100 | 15 | viii |
| C <sub>2</sub> H <sub>5</sub> CHO | 6.4      | 0.066 | 0.015 | 20 | 0.061 | 0.014 | 15 | viii |
| GLYOX                             | 3, 12    | 0.077 | 0.022 | 21 | 0.037 | 0.002 | 9  | ix   |
| HCHO                              | 11.8     | -     | -     | -  | 12.5  | 4.0   | 9  | xi   |
| <b><u>Ketones</u></b>             |          |       |       |    |       |       |    |      |
| MVK                               | 6.4      | 1.448 | 0.664 | 20 | 0.140 | 0.065 | 15 | viii |
| CH <sub>3</sub> COCH <sub>3</sub> | 6.4      | 2.446 | 0.843 | 20 | 1.948 | 0.371 | 15 | viii |
| ACETOL                            | 16.8     | 0.243 | 0.130 | 12 | 0.165 | 0.025 | 15 | vii  |
| NOPINONE                          | 1.5, 9.2 | 0.007 | 0.005 | 5  | 0.005 | 0.004 | 4  | x    |
| <b><u>Peroxides</u></b>           |          |       |       |    |       |       |    |      |
| H <sub>2</sub> O <sub>2</sub>     | 16.8     | 0.884 | 0.191 | 16 | 0.634 | 0.054 | 3  | vii  |
| ISOPOOH+IEPOX                     | 16.8     | 0.247 | 0.147 | 12 | 0.055 | 0.010 | 3  | vii  |

**Table S1.** Continued.

| <b><i>Terpenoids</i></b> |          |                  |       |    |       |       |    |      |
|--------------------------|----------|------------------|-------|----|-------|-------|----|------|
| $\alpha$ -pinene         | 1.5, 9.2 | 0.079            | 0.008 | 5  | 0.024 | 0.003 | 3  | x    |
|                          | 6.4      | 0.047            | 0.011 | 20 | 0.013 | 0.003 | 15 | viii |
| $\beta$ -pinene          | 1.5, 9.2 | 0.232            | 0.005 | 5  | 0.074 | 0.007 | 4  | x    |
|                          | 6.4      | 0.152            | 0.042 | 20 | 0.044 | 0.012 | 15 | viii |
| limonene                 | 1.5, 9.2 | 0.061            | 0.006 | 5  | 0.012 | 0.008 | 4  | x    |
|                          | 6.4      | 0.011            | 0.003 | 20 | 0.003 | 0.001 | 15 | viii |
| 3-carene                 | 1.5, 9.2 | 0.148            | 0.021 | 5  | 0.040 | 0.004 | 3  | x    |
| myrcene                  | 1.5, 9.2 | 0.009            | 0.001 | 5  | 0.003 | 0.000 | 4  | x    |
| camphene                 | 1.5, 9.2 | 0.004            | 0.002 | 5  | bdl   | bdl   | 4  | x    |
| terpinolene              | 1.5, 9.2 | 0.004            | 0.002 | 5  | bdl   | bdl   | 4  | x    |
| $\alpha$ -terpinene      | 1.5, 9.2 | bdl <sup>j</sup> | bdl   | 5  | bdl   | bdl   | 4  | x    |
| $\gamma$ -terpinene      | 1.5, 9.2 | 0.001            | 0.001 | 5  | bdl   | bdl   | 4  | x    |
| methyl chavicol          | 1.5, 9.2 | 0.079            | 0.013 | 5  | 0.037 | 0.006 | 4  | x    |
| $\alpha$ -bergamotene    | 1.5, 9.2 | 0.034            | 0.002 | 5  | 0.003 | 0.001 | 4  | x    |
| unspeciated SQT          | 1.5, 9.2 | 0.022            | 0.007 | 5  | 0.003 | 0.001 | 4  | x    |

<sup>a</sup>Measurement technique references: (1) Faloon et al. (2004). (2) Goldstein et al. (2000). (3) Bauer et al. (2000). (4) Mao et al. (2009). (5) Farmer et al. (2010). (6) Wolfe et al. (2009). (7) Crouse et al. (2006). (8) Goldan et al. (2004). (9) Huisman et al. (2008). (10) Bouvier-Brown et al. (2009). (11) Choi et al. (2010).

<sup>b</sup>Sum peroxy nitrates.

<sup>c</sup>Sum alkyl nitrates.

<sup>d</sup>Below detection limit.

**Table S2.** Model-measurement inter-comparison for selected observations. Comma-separated heights denote different measuring heights for hot and cold periods. Measurements are taken from Table S1. Concentrations are in ppbv unless otherwise specified.

| Species                                      | Height<br>m | Hot Period |          |                      | Cool Period |          |         |
|----------------------------------------------|-------------|------------|----------|----------------------|-------------|----------|---------|
|                                              |             | Model      | Meas     | % Diff. <sup>a</sup> | Model       | Meas     | % Diff. |
| O <sub>3</sub>                               | 12.5        | 50.6       | 50.8     | -0.3                 | 45.6        | 45.5     | 0.3     |
| CO                                           | 12.5        | 97         | 97       | 0.5                  | \$113       | 116      | -2.9    |
| OH (10 <sup>6</sup> molec cm <sup>-3</sup> ) | 9.4         | 3.08E-04   | 3.24E-04 | -5.0                 | 1.96E-04    | 1.87E-04 | 5.0     |
| HO <sub>2</sub>                              | 9.4         | 0.033      | 0.029    | 13.4                 | 0.018       | 0.021    | -14.9   |
| <b><u>NO<sub>y</sub></u></b>                 |             |            |          |                      |             |          |         |
| NO <sub>2</sub>                              | 9           | 0.142      | 0.139    | 1.9                  | 0.385       | 0.368    | 4.6     |
| PAN                                          | 17.8        | 0.207      | 0.159    | 29.9                 | 0.438       | 0.449    | -2.5    |
| PPN                                          | 17.8        | 0.009      | 0.009    | -4.2                 | 0.042       | 0.039    | 8.5     |
| MPAN                                         | 17.8        | 0.032      | 0.031    | 2.8                  | 0.035       | 0.030    | 16.5    |
| ΣPN                                          | 9           | 0.290      | 0.185    | 56.7                 | 0.533       | 0.430    | 24.0    |
| ΣAN                                          | 9           | 0.125      | 0.142    | -12.3                | 0.093       | 0.119    | -21.8   |
| HNO <sub>3</sub>                             | 16.8        | 0.562      | 0.555    | 1.3                  | 0.285       | 0.273    | 4.2     |
| HONO                                         | 16.8        | 0.001      | 0.022    | -97.4                | 0.001       | 0.046    | -92.2   |
| <b><u>Alkenes</u></b>                        |             |            |          |                      |             |          |         |
| isoprene                                     | 6.4         | 1.627      | 1.645    | -1.1                 | 0.251       | 0.211    | 19.2    |
| <b><u>Organic Acids</u></b>                  |             |            |          |                      |             |          |         |
| CH <sub>3</sub> CO <sub>2</sub> H            | 16.8        | 4.582      | 4.494    | 2.0                  | 2.055       | 2.078    | -1.1    |
| HCOOH                                        | 16.8        | 4.085      | 4.099    | -0.3                 | 2.417       | 2.396    | 0.9     |
| CH <sub>3</sub> CO <sub>3</sub> H            | 16.8        | 0.297      | 0.289    | 2.7                  | 0.137       | 0.138    | -0.4    |
| <b><u>Alcohols</u></b>                       |             |            |          |                      |             |          |         |
| MBO                                          | 6.4         | 3.237      | 3.182    | 1.7                  | 0.659       | 0.623    | 5.7     |
| CH <sub>3</sub> OH                           | 6.4         | 5.346      | 5.637    | -5.2                 | 4.297       | 4.644    | -7.5    |
| C <sub>2</sub> H <sub>5</sub> OH             | 6.4         | 1.577      | 1.56     | 1.1                  | 1.363       | 1.400    | -2.7    |
| IPROPOL                                      | 6.4         | 0.077      | 0.08     | -3.4                 | 0.071       | 0.074    | -3.4    |
| <b><u>Aldehydes</u></b>                      |             |            |          |                      |             |          |         |
| MACR                                         | 6.4         | 0.395      | 0.404    | -2.3                 | 0.112       | 0.12     | -6.9    |
| CH <sub>3</sub> CHO                          | 6.4         | 0.457      | 0.549    | -16.7                | 0.402       | 0.426    | -5.6    |
| C <sub>2</sub> H <sub>5</sub> CHO            | 6.4         | 0.066      | 0.066    | -0.2                 | 0.057       | 0.061    | -6.0    |
| GLYOX                                        | 3, 12       | 0.071      | 0.077    | -8.4                 | 0.035       | 0.037    | -4.1    |
| HCHO                                         | 11.8        | 4.165      | -        | -                    | 1.400       | 12.5     | -89     |

**Table S2.** Continued.

| <b><u>Ketones</u></b>             |          |       |                  |        |       |       |       |
|-----------------------------------|----------|-------|------------------|--------|-------|-------|-------|
| MVK                               | 6.4      | 1.432 | 1.448            | -1.1   | 0.144 | 0.14  | 2.5   |
| CH <sub>3</sub> COCH <sub>3</sub> | 6.4      | 2.545 | 2.446            | 4.1    | 1.892 | 1.948 | -2.9  |
| ACETOL                            | 16.8     | 0.238 | 0.243            | -2.3   | 0.164 | 0.165 | -0.7  |
| NOPINONE                          | 1.5, 9.2 | 0.010 | 0.007            | 44.0   | 0.005 | 0.005 | 7.7   |
| <b><u>Peroxides</u></b>           |          |       |                  |        |       |       |       |
| H <sub>2</sub> O <sub>2</sub>     | 16.8     | 0.856 | 0.884            | -3.2   | 0.531 | 0.634 | -16.3 |
| ISOPOOH+IEPOX                     | 16.8     | 0.495 | 0.247            | 100.4  | 0.027 | 0.055 | -50.1 |
| <b><u>Terpenoids</u></b>          |          |       |                  |        |       |       |       |
| α-pinene                          | 1.5, 9.2 | 0.086 | 0.079            | 8.6    | 0.020 | 0.024 | -17.5 |
| β-pinene                          | 1.5, 9.2 | 0.156 | 0.232            | -32.7  | 0.030 | 0.074 | -59.7 |
| limonene                          | 1.5, 9.2 | 0.053 | 0.061            | -13.6  | 0.015 | 0.012 | 21.1  |
| 3-carene                          | 1.5, 9.2 | 0.081 | 0.148            | -45.0  | 0.020 | 0.04  | -51.0 |
| myrcene                           | 1.5, 9.2 | 0.037 | 0.009            | 311.0  | 0.009 | 0.003 | 185.2 |
| camphene                          | 1.5, 9.2 | 0.057 | 0.004            | 1316.8 | 0.016 | bdl   | -     |
| terpinolene                       | 1.5, 9.2 | 0.008 | 0.004            | 110.5  | 0.002 | bdl   | -     |
| α-terpinene                       | 1.5, 9.2 | 0.004 | bdl <sup>b</sup> | -      | 0.001 | bdl   | -     |
| γ-terpinene                       | 1.5, 9.2 | 0.009 | 0.001            | 777.8  | 0.002 | bdl   | -     |
| Methyl chavicol                   | 1.5, 9.2 | 0.081 | 0.079            | 3.0    | 0.013 | 0.037 | -64.0 |
| α-bergamotene                     | 1.5, 9.2 | 0.027 | 0.034            | -19.6  | 0.008 | 0.003 | 173.0 |
| unspeciated SQT                   | 1.5, 9.2 | 0.008 | 0.022            | -64.7  | 0.004 | 0.003 | 31.4  |

<sup>a</sup>Calculated as 100\*(Model - Meas)/Meas.

<sup>b</sup>Below detection limit.

**References**

- Bauer, M. R., Hultman, N. E., Panek, J. A., and Goldstein, A. H.: Ozone deposition to a ponderosa pine plantation in the Sierra Nevada Mountains (CA): A comparison of two different climatic years, *J. Geophys. Res.*, 105, 22123-22136, 2000.
- Bouvier-Brown, N. C., Goldstein, A. H., Gilman, J. B., Kuster, W. C., and de Gouw, J. A.: In-situ ambient quantification of monoterpenes, sesquiterpenes, and related oxygenated compounds during BEARPEX 2007: implications for gas- and particle-phase chemistry, *Atmos. Chem. Phys.*, 9, 5505-5518, 2009.
- Choi, W., Faloon, I. C., Bouvier-Brown, N. C., McKay, M., Goldstein, A. H., Mao, J., Brune, W. H., LaFranchi, B. W., Cohen, R. C., Wolfe, G. M., Thornton, J. A., Sonnenfroh, D. M., and Millet, D. B.: Observations of elevated formaldehyde over a forest canopy suggest missing sources from rapid oxidation of arboreal hydrocarbons, *Atmos. Chem. Phys.*, 10, 8761-8781, 2010.
- Crounse, J. D., McKinney, K. A., Kwan, A. J., and Wennberg, P. O.: Measurement of gas-phase hydroperoxides by chemical ionization mass spectrometry, *Analytical Chemistry*, 78, 6726-6732, 2006.
- Faloon, I. C., Tan, D., Leshner, R. L., Hazen, N. L., Frame, C. L., Simpas, J. B., Harder, H., Martinez, M., Di Carlo, P., Ren, X. R., and Brune, W. H.: A laser-induced fluorescence instrument for detecting tropospheric OH and HO<sub>2</sub>: Characteristics and calibration, *J. Atmos. Chem.*, 47, 139-167, 2004.
- Farmer, D. K., Perring, A. E., Wooldridge, P. J., Blake, D. R., Baker, A., Meinardi, S., Huey, L. G., Tanner, D., O.Vargas, and Cohen, R. C.: Impact of organic nitrates on urban ozone production, *Atmos. Chem. Phys. Discuss.*, 10, 23423-23448, 2010.
- Goldan, P. D., Kuster, W. C., Williams, E., Murphy, P. C., Fehsenfeld, F. C., and Meagher, J.: Nonmethane hydrocarbon and oxy hydrocarbon measurements during the 2002 New England Air Quality Study, *Journal Of Geophysical Research-Atmospheres*, 109, D21309, 10.1029/2003JD004455, 2004.
- Goldstein, A. H., Hultman, N. E., Fracheboud, J. M., Bauer, M. R., Panek, J. A., Xu, M., Qi, Y., Guenther, A. B., and Baugh, W.: Effects of climate variability on the carbon dioxide, water, and sensible heat fluxes above a ponderosa pine plantation in the Sierra Nevada (CA), *Agr. Forest Meteorol.*, 101, 113 - 129, 2000.
- Huisman, A. J., Hottle, J. R., Coens, K. L., DiGangi, J. P., Galloway, M. M., Kammrath, A., and Keutsch, F. N.: Laser-induced phosphorescence for the in situ detection of glyoxal at part per trillion mixing ratios, *Analytical Chemistry*, 80, 5884-5891, 2008.
- Mao, J., Ren, X., Brune, W. H., Olson, J. R., Crawford, J. H., Fried, A., Huey, L. G., Cohen, R. C., Heikes, B., Singh, H. B., Blake, D. R., Sachse, G. W., Diskin, G. S., Hall, S. R., and Shetter, R. E.: Airborne measurement of OH reactivity during INTEX-B, *Atmos. Chem. Phys.*, 9, 163-173, 2009.
- Wolfe, G. M., Thornton, J. A., Yatavelli, R. L. N., McKay, M., Goldstein, A. H., LaFranchi, B., Min, K. E., and Cohen, R. C.: Eddy covariance fluxes of acyl peroxy nitrates (PAN, PPN and MPAN) above a Ponderosa pine forest, *Atmos. Chem. Phys.*, 9, 615-634, 2009.
